1 **Complete mitochondrial genomes of Thai and Lao populations indicate an**  
2 **ancient origin of Austroasiatic groups and demic diffusion in the spread of**  
3 **Tai-Kadai languages**

4 Wibhu Kutanan<sup>1,2,\*</sup>, Jatupol Kampuansai<sup>3</sup>, Metawee Srikummool<sup>4</sup>, Daoroong Kangwanpong<sup>3</sup>,  
5 Silvia Ghirotto<sup>5</sup>, Andrea Brunelli<sup>5</sup>, and Mark Stoneking<sup>2,\*</sup>

6

7 <sup>1</sup>Department of Biology, Faculty of Science, Khon Kaen University, Khon Kaen, Thailand

8 <sup>2</sup>Department of Evolutionary Genetics, Max Planck Institute for Evolutionary Anthropology,  
9 Leipzig, Germany

10 <sup>3</sup>Department of Biology, Faculty of Science, Chiang Mai University, Chiang Mai, Thailand

11 <sup>4</sup>Department of Biochemistry, Faculty of Medical Science, Naresuan University, Phitsanulok,  
12 Thailand

13 <sup>5</sup>Department of Life Science and Biotechnology, University of Ferrara, Ferrara, Italy.

14

15

16 \* Corresponding authors;

17 1. Professor Dr. Mark Stoneking, Department of Evolutionary Genetics, Max Planck Institute for  
18 Evolutionary Anthropology Deutscher Platz 6, D04103 Leipzig, Germany

19 Tel: +49 341 3550 502; Fax: +49 341 3550 555; E-mail: [stoneking@eva.mpg.de](mailto:stoneking@eva.mpg.de)

20 2. Dr. Wibhu Kutanan, Department of Biology, Faculty of Science, Khon Kaen University,  
21 Mittapap Road, Khon Kaen, 40002, Thailand

22 Tel: +66 43 202 531; Fax: + 66 43 202 530; Email: [wibhu@kku.ac.th](mailto:wibhu@kku.ac.th)

23

24

25

26

27 **Abstract**

28           The Tai-Kadai (TK) language family is thought to have originated in southern China and  
29 spread to Thailand and Laos, but it is not clear if TK languages spread by demic diffusion (i.e., a  
30 migration of people from southern China) or by cultural diffusion, with native Austroasiatic (AA)  
31 speakers switching to TK languages. To address this and other questions, we obtained 1,234  
32 complete mtDNA genome sequences from 51 TK and AA groups from Thailand and Laos. We  
33 find high genetic heterogeneity, with 212 haplogroups. TK groups are more genetically  
34 homogeneous than AA groups, with the latter exhibiting more ancient/basal mtDNA lineages, and  
35 showing more drift effects. Modeling of demic diffusion, cultural diffusion, and admixture  
36 scenarios consistently supports the spread of TK languages by demic diffusion. Surprisingly, there  
37 is significant genetic differentiation within ethnolinguistic groups, calling into question the  
38 common assumption that there is genetic homogeneity within ethnolinguistic groups.

39

40 **Key words:** Tai-Kadai, Austroasiatic, mitochondrial DNA, demic diffusion, Thailand

41

42

43

44

45

46

47

48

49

50

51

52 Thailand and Laos are regarded as the geographical heart of Mainland Southeast Asia  
53 (MSEA) (Fig. 1). Archaeological evidence suggests a long history of human occupation of the  
54 area, with the oldest human remains dated to 46-63 thousand years ago (kya) from Tam Pa Ling  
55 Cave<sup>1</sup>, and cultural remains dating to 35-40 kya<sup>2-3</sup>. A potential role for Thailand/Laos as a corridor  
56 between southern China and Island Southeast Asia (ISEA) is further indicated by archaeological  
57 evidence for agricultural communities that may have expanded from the center of the Yangtze  
58 valley during the Neolithic period<sup>4-5</sup>.

59 There is also considerable linguistic diversity, with five language families (Tai-Kadai (TK),  
60 Austroasiatic (AA), Sino-Tibetan (ST), Hmong-Mien (HM) and Austronesian (AN)), spoken in  
61 the area. Most people speak TK languages (94.40%, in Thailand and 69.60% in Laos) while AA  
62 is the second most common language family (4.10% in Thailand and 22.70% in Laos)<sup>6</sup>. However,  
63 the AA family is more diverse (27 languages in Thailand and 47 languages in Laos) than TK (16  
64 languages in Thailand and 21 languages in Laos). The ST and HM families are concentrated in the  
65 area of northern and northwestern Thailand as well as northern and central Laos (ST: 19 languages  
66 in Thailand and 11 languages in Laos; HM: 3 languages in Thailand and 4 languages in Laos). The  
67 AN family is restricted to southern Thailand with just 6 languages<sup>6</sup>. Both major families (AA and  
68 TK) are widespread across Asia; there are 167 AA languages spoken by ~102 million people from  
69 South Asia (Bangladesh and India) to southern China and MSEA, including Malaysia; and 92 TK  
70 languages spoken by ~80 million people in northeast India, southern China, Vietnam, Myanmar,  
71 Cambodia, Thailand and Laos<sup>6</sup>. Although the origin and spread of AA is debatable<sup>7-8</sup>, AA people  
72 are generally considered to be descended from the earliest inhabitants of the region<sup>9-10</sup>. TK is  
73 generally considered to have arisen in southeast China prior to 2.5 kya and then spread to SEA  
74 between 1-2 kya<sup>11-12</sup>.

75 Although archaeological and linguistic evidence point to an expansion from southern  
76 China, physical anthropological studies indicate that the present-day Thai people resemble ancient  
77 people<sup>13</sup> as well as modern AA people in northern Thailand<sup>14</sup>. Therefore, there are two competing  
78 hypotheses concerning the origin of the modern Thai/Lao TK people: (1) a demic expansion of  
79 people from southern China that brought their genes, culture, and language to Thailand/Laos; or  
80 (2) a cultural diffusion from southern China that resulted in native AA peoples adopting the TK  
81 language and culture. This general question of demic vs. cultural diffusion is a longstanding one

82 concerning expansions in other parts of the world, particularly those involving languages and/or  
83 agricultural practices, e.g. expansions associated with Indo-European, Bantu, Han and  
84 Austronesian languages<sup>15-22</sup>. While genetic studies have proven informative in distinguishing  
85 between demic vs. cultural diffusion in these other contexts, to date genetic studies have not been  
86 applied to this question with respect to TK peoples. In particular, previous mitochondrial (mt)  
87 DNA studies on Thai/Lao populations were too limited to address this question via phylogenetic  
88 or simulation based analyses<sup>23-25</sup>. Therefore, in order to address the role of demic vs. cultural  
89 diffusion in the origins of the TK people as well as investigate other aspects of Thai/Lao prehistory,  
90 we analyze here 1,234 complete mtDNA genome sequences from 51 Thai/Laos populations,  
91 comprising a comprehensive sampling of TK and AA genetic diversity

92

## 93 **Results**

### 94 ***Genetic diversity is higher in TK than in AA groups***

95 For the 1,234 mtDNA genome sequences obtained, there are 761 distinct sequences  
96 (haplotypes) belonging to 212 haplogroups (Supplementary Table 1). The summary statistics for  
97 the genetic diversity in each population are provided in Supplementary Table 2. Haplotype  
98 diversity ( $h$ ) ranges from 1.00 in the LA2 (see Fig. 1 for population locations and population  
99 abbreviations) to 0.80 in the TN2 group. The SK, BO and TN1 groups also exhibit  $h$  values  
100 somewhat lower than the remaining populations; the same trend is observed for haplogroup  
101 diversity, as relatively large values are observed in almost all populations except in TN1, TN2, SK  
102 and BO. Both nucleotide diversity ( $\pi$ ) and mean number of pairwise differences (MPD) are also  
103 the lowest in the TN1 group (0.0013 and 21.41, respectively), while the largest values are observed  
104 in the MO2 group (0.0026 and 42.6, respectively).

105 Haplotype and haplogroup diversity values as well as the number of segregating sites are  
106 significantly higher for TK than for AA groups (Mann-Whitney U tests:  $h$ :  $Z = 3.34$ ,  $P = 0.0008$ ,  
107 haplogroup diversity:  $Z = 3.53$ ,  $P = 0.0004$ , number of segregating site:  $Z = 2.85$ ,  $P = 0.0044$ ).  
108 However, the  $\pi$  values of AA groups are not significantly differ from those of the TK groups ( $Z =$   
109 1.45,  $P = 0.15$ ).

### 110 ***Greater genetic heterogeneity of AA groups***

111 The multidimensional scaling (MDS) analysis (Fig. 2a-b) revealed that in the third  
112 dimension AA and TK groups tended to be separated; this separation was more apparent when  
113 three outliers were excluded (Fig. 2c-d). The correspondence analysis (CA) analysis based on  
114 haplogroup frequencies (Supplementary Fig. 1) indicates that specific haplogroups are associated  
115 with the populations showing relatively high levels of genetic differentiation, namely: haplogroup  
116 B6a in TN1; haplogroup M12a1a in TN3; haplogroup F1a1a in TN2 and BO; and haplogroup  
117 B5a1d in SK and KA. Overall, the MDS and CA analyses revealed greater genetic heterogeneity  
118 among AA than TK groups. This result is supported by the analysis of molecular variance  
119 (AMOVA) (Table 1), as 11.44% of the variance is among AA populations, compared to 4.74% for  
120 the TK populations. However, neither linguistic nor geographic classifications of the populations  
121 provide a good match to the underlying genetic structure of the Thai/Laos populations, as in all  
122 such classifications the among-population component of the variance is higher than the among-  
123 group component (Table 1). Moreover, the Mantel test for the correspondence between genetic  
124 and geographic distances between populations is not significant in all types of geographic distances  
125 tested (great circle distance:  $r = 0.03$ ,  $P = 0.31$ , least cost path distance:  $r = 0.04$ ,  $P = 0.30$  and  
126 resistance distance:  $r = -0.65$ ,  $P = 0.75$ ). Thus, the genetic structure of the Thai/Laos populations  
127 is more complicated than would be predicted from either linguistics or geography.

128 Greater genetic homogeneity among the TK populations was also reflected in the haplotype  
129 sharing analysis (Supplementary Table 3), which showed that they shared more haplotypes than  
130 the AA populations. In particular, the various KM populations shared a number of haplotypes, as  
131 did the PU populations, indicating some recent genetic exchange/ancestry among populations  
132 within the same ethnolinguistic group. The highest number of shared haplotypes is five, which are  
133 shared among the KM5-KM6 and PU2-PU4 groups. Many haplotypes in the PU are shared with  
134 almost all of the other TK populations. Among the AA populations, despite the relatively large  
135 genetic differences between the TN2 and TN3 populations, they share four haplotypes. Overall,  
136 only four populations (IS3, SK, MO1 and MO4) did not share any haplotypes with any other  
137 population.

### 138 ***Significant genetic differentiation within ethnolinguistic groups***

139 Surprisingly, we observed striking and significant genetic differences between populations  
140 classified as the same ethnolinguistically but sampled from different locations. This can be seen in  
141 the MDS analysis (Fig. 2a-b), in which two of the three most extreme outliers are from the same

142 ethnolinguistic group, namely two of the three AA-speaking H'tin groups, TN1 and TN2 (the third  
143 outlier is the SK, a TK-speaking group from northeastern Thailand). In fact, the MDS analysis  
144 shows that in many cases populations from the same ethnolinguistic group are not genetically  
145 similar. This is further indicated by an AMOVA for each separate ethnolinguistic group that was  
146 sampled from multiple locations (Table 1); in all such instances, the among-populations variance  
147 component is significantly different from zero. This unexpected high degree of heterogeneity  
148 within the same ethnolinguistic group contributes to the lack of correspondence between the  
149 genetic structure of the Thai/Laos populations and their geographic/linguistic relationships.

### 150 *Relationships with other Asian populations*

151 The genetic relationships of 113 Asian populations (51 from the current study and 62 from  
152 the literature; Supplementary Table 4) as revealed by MDS analysis indicated, in general,  
153 population clustering by both language family and macro-geographic scale (Fig. 3). The SEA  
154 populations who speak AN, AA and TK languages are largely separated from North and South  
155 Asian populations. The AN and AA groups are further differentiated by the second dimension with  
156 the intermediate position of the TK populations among them. These results are also seen in the  
157 Neighbor Joining (NJ) tree, with the East Asian populations separated from the North and South  
158 Asian populations (Supplementary Fig. 2). Most of the AN groups from Taiwan, Philippines, and  
159 Island Southeast Asia (ISEA) are separated from the Thailand TK and AA populations. The TK  
160 and AA populations are mostly intermingled with a few AN populations also clustering with them.  
161 Overall, TK and AA populations are closed to AN population in both MDS (Fig. 3) and NJ tree  
162 (Supplementary Fig. 2). Among the presently studied populations, again, the TN1, TN2 and SK  
163 are extremely divergent (in keeping with their relatively low amounts of genetic diversity) but they  
164 nonetheless cluster with their neighbors from Thailand. There is also a clear division in the AA  
165 populations: MO1 and MO5 show affinities with populations from Myanmar and India, reflecting  
166 their genetic relatedness (Fig. 3), and are distinct from the other Mon and the other Thai  
167 populations. This could reflect either common ancestry of MO1 and MO5 with groups from  
168 Myanmar and India and/or gene flow. Surprisingly, even though the two Khmer populations (KH1  
169 and KH2) from northeastern Thailand have close geographic proximity and shared haplotypes,  
170 they are genetically distinct from one another and from an ethnolinguistically-related group, the  
171 Cambodian Khmer (KH\_C).

### 172 *mtDNA lineages*

173 The above population relationships are based on analyses of the entire set of mtDNA  
174 sequences; additional insights come from considering the distribution and other characteristics of  
175 specific haplogroups. Among the 1,234 mtDNA genomes belonging to 212 haplogroups, F1 is by  
176 far the predominant lineage (21.80%), followed by B5 (13.13%), M7 (11.02%) and B4 (6.00%)  
177 (Fig. 1). All of these haplogroups are common in SEA populations and predominate in most of the  
178 studied populations, with the exception of two TK (KM8 and PU5) and 12 AA (PL, LW1-LW3,  
179 KH2, BO, SU and MO1-MO5) populations (Fig. 1). Haplogroup coalescent times using Bayesian  
180 Markov Chain Monte Carlo (MCMC) estimates (BE) and credible intervals (CI) by haplogroup  
181 are shown in Fig. 4. A schematic phylogeny of the main haplogroups, based on Bayesian MCMC  
182 analyses, is provided in Fig. 5, while full Bayesian maximum clade credibility (MCC) trees by  
183 haplogroup are presented in Supplementary Fig. 3. Networks of the sequences in each haplogroup  
184 are presented in Supplementary Fig. 4, and frequency maps of some haplogroups are in  
185 Supplementary Fig. 5. A detailed discussion of each main haplogroup is in the Supplementary  
186 Text; here we summarize the main findings.

187 The haplogroup profiles by population emphasize the greater genetic heterogeneity in AA  
188 groups than in TK groups (Fig. 1 and Supplementary Table 1). Some AA groups have extremely  
189 high frequencies of particular haplogroups, indicating the pronounced effect of genetic drift;  
190 examples include: R9b2 with a frequency of 32.00% in TN2; R22 with frequencies of 17.39% in  
191 BO and 20.00% in SU; D4 with frequencies of 28.00% in MO1, 31.81% in MO5, 22.73% in LW1,  
192 and 20.00% in PL; and B6a with a frequency of 72.00% in TN1. Overall, the greater heterogeneity  
193 in haplogroup distribution and pronounced haplogroup frequency differences are consistent with  
194 an older presence of AA groups in Thailand.

195 Some haplogroups prevalent in South Asia also occur in some AA groups, especially the  
196 Mon groups. These include D4, mentioned above, as well as W3a1b, which is reported here for  
197 the first time in MSEA. W3a1b was found in two Mon populations (24.00% in MO1 and 4.35%  
198 in MO2); these haplogroups provide further evidence for genetic connections between these Mon  
199 groups and South Asia.

200 Although many haplogroups are shared between MSEA and ISEA, there are distinct  
201 differences in the distribution of some sublineages. For example, haplogroup B4 is widespread  
202 throughout SEA; in our study it is almost entirely restricted to TK groups (Fig. 1 and

203 Supplementary Table 1) where it occurs as three primary sublineages, namely B4b1a2a, B4a1c4  
204 and B4c2, all of which have been reported previously in MSEA<sup>21,26</sup>. Several other B4 sublineages  
205 characteristic of Taiwan (e.g., B4b1a2h, B4b1a2f and B4b1a2g<sup>27</sup>), the Philippines (e.g., B4b1a2b,  
206 B4b1a2c and B4b1a2d<sup>28</sup>) and Oceania (e.g., B4a1a1a<sup>29</sup>) were not found in our study, in agreement  
207 with previous studies<sup>26,30</sup>. Overall, the lack of sharing of recent sublineages indicates a lack of  
208 recent contact between MSEA and ISEA (Supplementary Fig. 4).

209 Finally, the more extensive sampling of Thai/Laos mtDNA sequences in this study has  
210 resulted in much deeper ages for some haplogroups that were poorly sampled in previous studies.  
211 For example, we estimate that haplogroups R9b and R22 both coalesce at ~39 kya (Fig. 4),  
212 compared to previous estimates of ~29 kya<sup>31</sup> and ~19 kya<sup>26</sup> respectively. Moreover, while R9b and  
213 R22 have been suggested to originate in southern China<sup>31</sup> and ISEA<sup>26,32</sup> respectively, northeastern  
214 Thailand is also a potential source for these haplogroups (Supplementary Fig. 5).

### 215 ***Population size change trends over time***

216 The Bayesian Skyline Plots (BSP) in each of the 51 populations individually  
217 (Supplementary Fig. 6) reveal four overall trends in change in  $N_e$  over time (Fig. 6). The most  
218 common trend (observed in 24 TK and 13 AA groups) is an increase in  $N_e$  around 50 to 40 kya,  
219 followed by stability and then a decline around 2 kya (Fig. 6a). A different trend is observed in  
220 most of the ethnic Lao populations (IS and LA) and one KM population; the IS1, IS2, LA2 and  
221 KM5 populations expanded continuously but stay stable for the present time (Fig. 7b) while IS4  
222 and LA1 show population expansions at around 50 kya and again around 10 kya (Fig. 6c). Another  
223 pattern of observed demographic change (Fig. 6d) is a stable  $N_e$  since the upper Paleolithic and  
224 then a sudden decline during the last 2 kya, which could produce a larger drift effect, and is seen  
225 in 8 AA groups.

### 226 ***Testing models of demic diffusion vs. cultural diffusion vs. admixture***

227 To address the role of demic vs. cultural diffusion in the origins of Thai/Lao people, we  
228 proposed and tested demographic models according to immigrant vs. indigenous hypotheses (Fig.  
229 7). The immigrant hypothesis (or demic diffusion) states that the nowadays TK people descend  
230 primarily from the TK-speaking groups from southern China who migrated southward in the last  
231 1 to 2 kya<sup>11-12</sup>. By contrast, the indigenous hypothesis (or cultural diffusion) suggests that the TK  
232 people descend primarily from native AA inhabitants who shifted culturally and linguistically<sup>9</sup>. In



233 addition, we consider another possible scenario, namely admixture, which explains the dual origin  
234 of the current TK people as reflecting a genetic mixing of incoming TK and indigenous AA groups.

235 Although these three demographic scenarios are proposed for all TK people,  
236 archaeological, linguistic and historical evidence clearly indicate the potential for differences in  
237 the local history and demography, especially for groups from northern vs. northeastern  
238 Thailand<sup>10,33</sup>. We therefore performed the analyses of Approximate Bayesian Computation (ABC)  
239 using three different data sets in all three demographic scenarios: (1) northern Thai people (Khon  
240 Mueang, KM); (2) ethnic Lao including northeastern Thai people (Lao Isan, IS) and Laotian (LA);  
241 and (3) Lao Isan (to infer the history of this specific population, for reasons detailed in the Methods  
242 section). In each analysis, we used AA populations for comparison and set priors for some  
243 parameters (e.g. divergence and admixture time) based on historical evidence, as detailed in the  
244 Methods section.

245 In general, the results of the ABC analyses show that in all cases the simulated data  
246 included the observed data (Supplementary Fig. 7) and the results of the model selection are  
247 consistent among different thresholds, i.e. the different numbers of simulations retained to fit the  
248 logistic regression curve. The highest posterior probabilities in both approaches, acceptance-  
249 rejection procedure (AR) (0.70-0.74) and weighted multinomial logistic regression (LR) (0.84-  
250 0.86), support the demic diffusion model in the northern Thai KM (Fig. 7). Even though the AA-  
251 speaking LW groups have culturally interacted with the KM<sup>9-10</sup>, they are not the maternal ancestor  
252 of the KM. The test of ethnic Lao (IS and LA; scenario 2) shows the same trend in supporting the  
253 demic diffusion model, although it received higher support by LR (0.76-0.79) than by AR (0.56-  
254 0.63). The ethnic Lao are thus genetically distinct from the neighboring AA speaking groups,  
255 including the KH, KA SO, SU and BU groups. These two results for TK groups across a vast area  
256 of Thailand and Laos thus indicate a genetic origin of the TK from southern China followed by a  
257 rapid population expansion from (presumably) a few groups to the current census size of around  
258 50 million, within 1 to 2 ky. For the last analysis concerning the origin of the IS population, there  
259 is no distinction between the demic diffusion and admixture models, which differ by  
260 absence/presence of migration between KH and IS beginning ~250 years ago. The AR assigned a  
261 probability of about 0.55 to demic diffusion and about 0.45 to admixture but *vice versa* in LR. In  
262 either event, this analysis does not support the purely cultural diffusion model.

263 The results of power analysis for the three tested datasets indicated that the true positive  
264 rate is generally good, in particular for the demic diffusion model in the first two tests (which was  
265 unequivocally supported by the model selection procedures). The false positive rate is low in  
266 almost all of the comparisons (less than 0.05) for the selected model of the second test, and slightly  
267 higher (0.066) for the selected model of the first test (Supplementary Table 5). In sum, these results  
268 confirm the reliability of the posterior probabilities of the models.

269

## 270 **Discussion**

271 In conclusion, the extensive and intensive sampling of complete mtDNA genomes in 51  
272 AA and TK groups from Thailand and Laos shows a high genetic diversification with a total of  
273 212 haplogroups observed. The proposed autochthonous ancient lineages are B5a1d, B6a, R22,  
274 R9b and F1f; the many basal lineages detected in this study suggests that the area of present-day  
275 Thailand and Laos may have been an ancient migratory route for modern humans, in accordance  
276 with the finding that the oldest modern human remains in East Asia are from Tam Pa Ling cave in  
277 Laos<sup>1</sup>. Previous studies have suggested Myanmar<sup>34</sup> and Cambodia<sup>26</sup> as the corridor for initial  
278 settlers, assuming travel along river valleys; our results indicate that in addition, early modern  
279 human groups may have migrated through the interior upland, as also suggested by archaeological  
280 evidence found in caves in the highlands<sup>3,35</sup>.

281 Several lines of evidence point to a more ancient presence of AA groups than of TK groups,  
282 including greater genetic heterogeneity and on average older maternal lineages, in keeping with  
283 previous studies<sup>24-25,36</sup>. There are also distinct affinities between some AA groups (especially the  
284 Mon groups) and South Asia, where AA groups are also found. TK groups are less heterogeneous,  
285 tend to show more signs of population expansion, and more genetic affinities with southern  
286 Chinese groups and with AN groups. The modeling of different demographic scenarios for  
287 different groups of populations further supports a demic diffusion of the ancestors of TK groups  
288 from southern China. The genetic affinities between TK and AN groups are in keeping with  
289 linguistic affinities between the TK and AN language families<sup>37</sup> and may be explained by the  
290 hypothesis that Austronesians are descended from a migration from northern China that also  
291 continued into southern China and MSEA<sup>27</sup>. There are further genetic affinities between MSEA

292 and ISEA, but no sharing of recent sublineages, in keeping with previous studies that suggested a  
293 pre-Austronesian migration from MSEA to ISEA<sup>38</sup>.

294 Finally, a surprising – and sobering – finding of this study is that there is significant genetic  
295 heterogeneity among samples from the same ethnolinguistic group from different locations. This  
296 results holds for all cases where there was more than one sampling location per ethnolinguistic  
297 group (Table 1). It appears that this heterogeneity arises from various sources. In the hill tribes,  
298 such as the Lawa and H'tin, isolation and drift due to geography and cultural constraints (e.g.,  
299 matrilocality) appear to be the major factor. For the lowland populations (MO, KH, IS, KM, and  
300 PU) recent gene flow with other groups seems to be the major factor. In any event, a common  
301 assumption in studies of genetic history is that different samples from the same ethnolinguistic  
302 group should have (more or less) the same history, and therefore one sampling location is assumed  
303 to be representative of the entire ethnolinguistic group. However, it would seem that this  
304 assumption should be evaluated carefully, especially in cases where ethnolinguistic groups are  
305 distributed across a wide geographic area; where feasible, multiple samples should be taken from  
306 the same ethnolinguistic group.

307

## 308 **Methods**

### 309 *Samples*

310 Blood or buccal samples were collected with informed consent from 1,234 unrelated  
311 subjects belonging to 51 populations that were classified into 23 ethnolinguistic groups (Fig. 1 and  
312 Supplementary Table 2). All groups speak either AA or TK languages and all are from Thailand,  
313 with the exception of two populations from Laos. Approvals for human research for this study  
314 were obtained from Chiang Mai University, Khon Kaen University, Naruesuan University, and the  
315 Ethics Commission of the University of Leipzig Medical Faculty.

### 316 *MtDNA sequencing and multiple alignment*

317 DNA was isolated as described previously from blood samples<sup>39</sup> and from buccal cells with  
318 the Gentra Puregene Buccal Cell Kit (Qiagen). Sequencing libraries were constructed using a  
319 multiplex protocol for the Illumina Genome Analyzer platform<sup>40</sup> and were enriched for mtDNA

320 as described previously<sup>41</sup>. Several Illumina platforms and lengths of sequencing reads were  
321 employed, with post processing using Illumina software and the Improved Based Identification  
322 System<sup>42</sup>. The software MIA<sup>43</sup>, which is implemented in an in-house sequence assembly-analysis  
323 pipeline for calling consensus sequences and detecting mtDNA heteroplasmy<sup>44</sup> was used to map  
324 sequencing reads to the revised Cambridge Reference Sequence<sup>45</sup>. Details concerning sequencing  
325 results and sequence coverage are provided in Supplementary Fig. 7. A multiple sequence  
326 alignment of the sequences and the Reconstructed Sapiens Reference Sequence (RSRS)<sup>46</sup> was  
327 executed by MAFFT 7.271<sup>47</sup>.

### 328 *Statistical Analyses*

329 The aligned sequences were assigned haplogroups using Haplogrep<sup>48</sup> with PhyloTree  
330 mtDNA tree build 17<sup>49</sup>. MitoTool<sup>50</sup> was also used to re-check haplogroup assignments. The  
331 software Arlequin 3.5.1.3<sup>51</sup> was used for the following analyses: measures of genetic diversity  
332 (Table 1), pairwise genetic distances ( $\Phi_{st}$ , pairwise difference), AMOVA and a Mantel test  
333 comparing genetic and geographic distances between populations; for the latter, we computed  
334 three types of geographic distance, i.e. great circle distance, least cost path distance, and resistance  
335 distance. The great circle distance matrix was generated by Geographic Distance Matrix Generator  
336 v 1.2.3<sup>52</sup> and the other two distance matrices were computed by the functions *costDistance* in the  
337 package *gdistance*<sup>53</sup> and using CIRCUITSCAPE<sup>54</sup> based on a constructed cost-surface raster,  
338 respectively. To create this cost-surface raster, briefly, R 3.2.0 was employed using the function  
339 *mosaic* from the package *raster*<sup>55</sup> to merge two data, i.e. a 30 second elevation grid generated from  
340 the WorldClim database<sup>56</sup> and vector files containing major rivers in Thailand and Laos obtained  
341 from NaturalEarth. Then, a cost-surface raster was reclassified with parameters known to affect  
342 human movements<sup>57</sup>, e.g. mountain, terrain and river.

343 Nonparametric MDS analysis (based on  $\Phi_{st}$  values) as well as CA analysis using  
344 haplogroup counts were constructed using STATISTICA 10.0 (StatSoft, Inc., USA).

345 BEAST 1.8 was used to construct BSP by population and MCC trees by haplogroup, based  
346 on MCMC analyses. The software jModel test 2.1.7<sup>58</sup> was employed to choose the most suitable  
347 model during creation of the input file of BEAST by BEAUTi v1.8<sup>59</sup>. BSP calculations were  
348 conducted with the data partitioned between coding and noncoding regions with respective  
349 mutation rates of  $1.708 \times 10^{-8}$  and  $9.883 \times 10^{-8}$ <sup>60</sup>. Tracer 1.6 (<http://tree.bio.ed.ac.uk/>

350 software/tracer) was used to visualize the BSP plot. For the BE and CI of haplogroup coalescent  
351 times, the RSRS was employed to root the mtDNA tree. The most probable tree from the BEAST  
352 runs was assembled with TreeAnnotator and drawn with FigTree v 1.4.0  
353 (<http://tree.bio.ed.ac.uk/software/figtree>). In order to check clustering of sequences by haplogroup,  
354 median-joining networks without pre- or post-processing steps were constructed by Network 4.11  
355 and visualized in Network publisher 1.3.0.0 ([www.fluxus-engineering.com](http://www.fluxus-engineering.com)). Contour maps are  
356 generated by Golden Software Surfer 10.0 (Golden Software Inc., USA).

357 The newly-generated 1,234 mtDNA sequences were compared with a reference data set  
358 comprising 2,129 Asian mtDNA genomes representing 62 populations retrieved from the literature  
359 (Supplementary Table 4). NJ tree (based on the  $\Phi_{st}$ ) were generated by MEGA 7<sup>61</sup>.

360 An ABC procedure was employed to choose the best-supported hypothesis about the  
361 maternal origins of the Thai and Laotian populations. Owing to the different local histories specific  
362 to each region, three different mtDNA data sets from the TK and AA as well as priori parameters  
363 (e.g. divergence times) were used in the simulation process (Fig. 7). As the origin time of  
364 prehistorical TK speaking groups is unknown, we employed the existing time of the Tai in southern  
365 China of ~3 kya, similar to a previous study<sup>62</sup>. Then some prehistorical TK groups started to  
366 separate from their common ancestor with the Chinese Dai from their homeland in southern China  
367 and spread southward to the area of present-day Thailand in the last 1 to 2 kya<sup>10-12</sup>. Some TK  
368 groups finally reached northern Thailand where LW groups are native inhabitants and founded  
369 their kingdom, named Lanna around the end of the 13<sup>th</sup> century A.D.<sup>9</sup>. The KM people, the majority  
370 of northern Thai, are either genetically from LW groups or admixed with them, and thus should  
371 originate at this time. We, therefore, conduct the first analysis by pooling ten KM populations  
372 (KM1-KM10) as well as combining the three AA-speaking Lawa groups (LW1-LW3) and using the  
373 Xishuanbanna Dai as a representative of the Tai source from southern China<sup>63</sup>. Although nowadays  
374 the IS and LA people constitute the vast majority of populations in northeastern Thailand and Laos,  
375 respectively, both of them share ethnic identity and the historical motherland of Lao Isan is in  
376 Laos<sup>33</sup>. Allowing for the differences in both routes of migration and times of prehistorical TK-  
377 groups, the migration from further north to the area of present-day Lao would have met the KH  
378 groups, one of the predominant AA people in SEA, who established the Angorian state around 1.2  
379 kya<sup>5</sup>. In addition, SU, KA, BU and SO are the other AA-groups distributed in the area of present-

380 day Laos whose ancestors could have interacted with TK groups. In the second analysis, therefore,  
381 the Xishuanbanna Dai is utilized as the Tai sources while all AA groups (KH1-KH2, SU, KA, BU,  
382 and SO) are combined and the TK-speaking Lao groups (LA1-LA2 and IS1-IS4) are pooled. In  
383 the last analysis, we focus on the IS, as they are a Lao group who recently migrated to northeastern  
384 Thailand, approximately 250 ya; evidence of biculturalism between KH and IS in northeastern  
385 Thailand has been recorded<sup>64</sup>. One potential scenario was that the IS (IS1-IS4) diverged from the  
386 LA (LA1-LA2) without any genetic contact with the KH (KH1-KH2); a second scenario is that IS  
387 did admix with KH after diverging from LA. Although an origin of IS from KH is unlikely, we  
388 also investigated this scenario.

389 The simulated datasets were generated by the software package ABCtoolbox<sup>65</sup>. The  
390 posterior probabilities were calculated by employing two different approaches, AR<sup>66</sup>, and LR<sup>67</sup>.  
391 The former approach considers only a certain number of “best” simulations, and then simply  
392 counts the proportion of those retained simulations that were generated by each investigated  
393 model. After a few hundred simulations, an excellent fit with the observed data indicates that this  
394 approach is reliable<sup>67</sup>, and therefore, 100, 200 and 500 of the best simulations were used in this  
395 analysis. According to the latter approach, a logistic regression is fitted where the model is the  
396 categorical dependent variable and the summary statistics are the predictive variables. The  
397 regression is local around the vector of observed summary statistics, and at the point equivalent to  
398 the observed vector of summary statistics, the probability of each model is estimated. Maximum  
399 likelihood was used to evaluate the  $\beta$  coefficients of the regression considering different numbers  
400 of retained simulations (50000, 100000 and 150000). The posterior probabilities for each model  
401 were calculated by the modified R scripts from  
402 <http://code.google.com/p/popabc/source/browse/#svn%2Ftrunk%2Fscripts>. The following  
403 summary statistics were employed: the number of haplotypes, haplotype diversity, total number of  
404 segregating sites, number of private segregating sites, Tajima's D, and mean number of pairwise  
405 differences for each population, as well as mean number of differences between pairs of  
406 populations and pairwise  $\Phi_{st}$ . The distribution of simulated data under different models with  
407 respect to the observed data was evaluated by a visual inspection of a Principal Component  
408 Analysis (PCA) of the best 1,000 (or 5,000) simulations for each model, using the PCA function  
409 implemented in the R package FactoMineR<sup>68</sup>.

410 The power to infer the correct model in all tests was estimated by generating 1,000 pseudo-  
411 observed datasets according to each analyzed model, with parameter values randomly chosen from  
412 the corresponding prior distribution. These pseudo-observed datasets were examined along with  
413 the same ABC framework applied in the model selection (i.e. with logistic regression and 50,000  
414 retained simulations). Three different sets of models were considered separately. For each model,  
415 we evaluated the proportion of cases where the true model was correctly chosen (i.e. true positives)  
416 as well as the proportion of cases where the model selection procedure assigned the highest support  
417 to one of the other two tested models (i.e. false positives), considering a posterior probability  
418 threshold of 0.5 to assign the support.

419

## 420 **References**

- 421 1. Demeter, F. *et al.* Anatomically modern human in Southeast Asia (Laos) by 46 ka. *Proc.*  
422 *Natl. Acad. Sci. USA* **109**, 14375–14380 (2012).
- 423 2. Anderson, D. *Lang Rong Rien Rockshelter: A Pleistocene-Early Holocene Archaeological*  
424 *Site from Krabi, Southwestern Thailand*, University of Pennsylvania Press: Philadelphia,  
425 (1990).
- 426 3. Shoocondej, R. Late Pleistocene activities at the Tham Lod rockshelter in highland Bang  
427 Mapha, Mae Hongson Province, Northwestern Thailand. In: *Uncovering Southeast Asia's*  
428 *Past* eds Bacus E.A., Glover I.C. & Pigott V.C. 22-37 NUS Press: Singapore, (2006).
- 429 4. Higham, C. & Higham, T. A New chronological framework for prehistoric Southeast Asia  
430 based on a Bayesian model from Ban Non Wat. *Antiquity* **83**, 125–144 (2009).
- 431 5. Higham, C. *Early Mainland Southeast Asia: From First Humans to Angkor*, River Books  
432 Press: Bangkok (2014).
- 433 6. Lewis, M.P., Simons G.F., & Fennig C.D. *Ethnologue: Languages of the World,*  
434 *Nineteenth edition*, SIL International: Dallas (2016). Available from  
435 <http://www.ethnologue.com>.
- 436 7. Diffloth, G. The contribution of linguistic palaeontology to the homeland of Austroasiatic.  
437 In: *The Peopling of East Asia: Putting Together the Archaeology, Linguistics and Genetics*  
438 eds Sagart L., Blench R. & Sanchez-Mazas A. 77-80 Routledge Curzon: London (2005).

- 439 8. Chaubey, G. *et al.* Population genetic structure in Indian Austroasiatic speaker: the role of  
440 landscape barriers and sex-specific admixture. *Mol. Biol. Evol.* **28(2)**, 1013–1024 (2011).
- 441 9. Condominas, G. *From Lawa to Mon, from Saa' to Thai*, Australian National University:  
442 Canberra (1990).
- 443 10. Penth, H. *A Brief History of Lanna: Civilizations of North Thailand Chiang Mai*, Silkworm  
444 Books: Chiang Mai (2000).
- 445 11. O'Connor, R. Agricultural change and ethnic succession in Southeast Asian states: A case  
446 for regional anthropology. *J. Asian Studies* **54 (4)**, 968–996 (1995).
- 447 12. Pittayaporn, P. Layers of Chinese loanwords in proto-southwestern Tai as evidence for the  
448 dating of the spread of southwestern Tai. *Manusya J. Humanities* **20**, 47–68 (2014).
- 449 13. Sangvichien, S. Neolithic skeleton from Ban Kao, Thailand, and the problem of Thai  
450 origins. *Curr. Anthropol.* **7**: 234–235 (1966).
- 451 14. Nakbunlung, S. *Origins and biological affinities of the modern Thai population: an*  
452 *osteological perspective*, Ph.D Thesis, University of Illinois: Urbana (1994).
- 453 15. Ammerman, A.J. & Cavalli-Sforza, L.L. *The Neolithic Transition and the Genetics of*  
454 *Populations in Europe*, Princeton University Press: New Jersey (1984).
- 455 16. Sokal, R., Oden, N.L. & Wilson, C. Genetic evidence for the spread of agriculture in  
456 Europe by demic diffusion. *Nature* **351**, 143–145 (1991).
- 457 17. Chikhi, L., Nichols, R.A., Barbujani, G. & Beaumont, M.A. Y genetic data support the  
458 Neolithic demic diffusion model. *Proc. Natl. Acad. Sci. USA* **99**, 11008–11013 (2002).
- 459 18. Diamond, J. & Bellwood, P. Farmers and their languages: the first expansions. *Science*  
460 **300**: 597–603 (2003).
- 461 19. Wen, B. *et al.* Genetic evidence supports demic diffusion of Han culture. *Nature* **7006**,  
462 302–305 (2004).
- 463 20. Battaglia, V. *et al.* Y-chromosomal evidence of the cultural diffusion of agriculture in  
464 Southeast Europe. *Eur. J. Hum. Genet.* **17(6)**, 820–830 (2009).
- 465 21. Peng, M.S., He, J.D., Liu, H.X. & Zhang, Y.P. Tracing the Austronesian footprint in  
466 mainland Southeast Asia: a perspective from mitochondrial DNA. *Mol. Biol. Evol.* **27**,  
467 2417–2430 (2010).



- 468 22. Pakendorf, B., Bostoen, K. & de Filippo, C. Molecular perspectives on the Bantu  
469 expansion: a synthesis. *Lang. Dyn. Change* **1**, 50–88 (2011).
- 470 23. Bodner, M. *et al.* Southeast Asian diversity: first insights into the complex mtDNA  
471 structure of Laos. *BMC Evol. Biol.* **11**, 49 (2011).
- 472 24. Kutanan, W. *et al.* Genetic structure of the Mon-Khmer speaking groups and their affinity  
473 to the neighboring Tai populations in Northern Thailand. *BMC Genet.* **12**, 56 (2011).
- 474 25. Kutanan, W. *et al.* Geography has more influence than language on maternal genetic  
475 structure of various northeastern Thai ethnicities. *J. Hum. Genet.* **59**, 512–520 (2014).
- 476 26. Zhang, X. *et al.* Analysis of mitochondrial genome diversity identifies new and ancient  
477 maternal lineages in Cambodian aborigines. *Nat. Commun.* **4**, 2599 (2013).
- 478 27. Ko, A.M.S. *et al.* Early Austronesians: into and out of Taiwan. *Am. J. Hum. Genet.* **94**,  
479 426–436 (2014).
- 480 28. Gunnarsdottir, E.D., Li, M., Bauchet, M., Finstermeier, K. & Stoneking, M. High-  
481 throughput sequencing of complete human mtDNA genomes from the  
482 Philippines. *Genome Res.* **21**, 1–11 (2011).
- 483 29. Duggan, A. *et al.* Maternal history of Oceania from complete mtDNA genomes: contrasting  
484 ancient diversity with recent homogenization due to the Austronesian expansion. *Am. J.*  
485 *Hum. Genet.* **94(5)**, 721–733 (2014).
- 486 30. Summerer, M. *et al.* Large-scale mitochondrial DNA analysis in Southeast Asia reveals  
487 evolutionary effects of cultural isolation in the multi-ethnic population of Myanmar. *BMC*  
488 *Evol. Biol.* **14**, 17 (2014).
- 489 31. Hill, C. *et al.* Phylogeography and ethnogenesis of aboriginal Southeast Asians. *Mol. Biol.*  
490 *Evol.* **23**, 2480–2491 (2006).
- 491 32. Hill, C. *et al.* A mitochondrial stratigraphy for island southeast Asia. *Am. J. Hum. Genet.*  
492 **80**, 29–43 (2007).
- 493 33. Schliesinger, J. *Tai group of Thailand, Volume 1: Introduction and overview*, White Lotus  
494 Press, Bangkok (2001).
- 495 34. Li, Y.C. *et al.* Ancient inland human dispersals from Myanmar into interior East Asia  
496 since the Late Pleistocene. *Sci. Reports* **5**, 9473 (2015).
- 497 35. Pureepatpong, N. Recent investigations of early people (late Pleistocene to early Holocene)  
498 from Ban Rai and Tham Lod rock shelter sites, Pang Mapha district, Mae Hongson

- 499 province, Northwestern Thailand. In: *Uncovering Southeast Asia's Past* eds Bacus E.A.,  
500 Glover I.C. & Pigott V.C. 38-45 NUS Press: Singapore, (2006).
- 501 36. Srithawong, S. *et al.* Genetic and linguistic correlation of the Kra–Dai-speaking groups in  
502 Thailand. *J. Hum. Genet.* **60**, 371–380 (2015).
- 503 37. Sagart, L. The higher phylogeny of Austronesian and the position of Tai-Kadai. *Oceanic*  
504 *Linguistics* **43(2)**, 411–444 (2004).
- 505 38. Jinam, T.A. *et al.* Evolutionary history of continental Southeast Asians: “early train”  
506 hypothesis based on genetic analysis of mitochondrial and autosomal DNA data. *Mol. Biol.*  
507 *Evol.* **29**, 3513-3527 (2012).
- 508 39. Seielstad, M., Bekele, E., Ibrahim, M., Touré, A. & Traoré, M. A view of modern human  
509 origins from Y chromosome microsatellite variation. *Genome Res.* **9**, 558–567 (1999).
- 510 40. Meyer, M. & Kircher, M. Illumina sequencing library preparation for highly multiplexed  
511 target capture and sequencing. *Cold Spring Harbor Protoc.* **6**, 1–10 (2010).
- 512 41. Maricic, T., Whitten, M. & Pääbo, S. Multiplexed DNA sequence capture of mitochondrial  
513 genomes using PCR products. *PLoS One* **5**, e14004 (2010).
- 514 42. Kircher, M., Stenzel, U. & Kelso, J. Improved base calling for the Illumina Genome  
515 Analyzer using machine learning strategies. *Genome Biol.* **10**, R83 (2009).
- 516 43. Briggs, A.W. *et al.* Targeted retrieval and analysis of five Neanderthal mtDNA genomes.  
517 *Science* **325**, 318–321 (2009).
- 518 44. Li, M. & Stoneking, M. A new approach for detecting low-level mutations in next  
519 generation sequence data. *Genome Biol.* **13**, R34 (2012).
- 520 45. Andrews, R.M. *et al.* Reanalysis and revision of the Cambridge reference sequence for  
521 human mitochondrial DNA. *Nat. Genet.* **23**, 147–147 (1999).
- 522 46. Behar, D.M. *et al.* A “Copernican” reassessment of the human mitochondrial DNA tree  
523 from its root. *Am. J. Hum. Genet.* **90**, 675–684 (2012).
- 524 47. Katoh, K. & Standley, D.M. MAFFT Multiple Sequence Alignment Software Version 7:  
525 Improvements in Performance and Usability. *Mol. Biol. Evol.* **30**, 772–780 (2013).
- 526 48. Kloss-Brandstätter, A. *et al.* HaploGrep: a fast and reliable algorithm for automatic  
527 classification of mitochondrial DNA haplogroups. *Hum. Mutat.* **32**, 25–32 (2010).
- 528 49. van Oven, M. & Kayser, M. Updated comprehensive phylogenetic tree of global human  
529 mitochondrial DNA variation. *Hum. Mutat.* **30**, E386–E394 (2009).

- 530 50. Fan, L. & Yao, Y.G. MitoTool: a web server for the analysis and retrieval of human  
531 mitochondrial DNA sequence variations. *Mitochondrion* **11**, 351–356 (2011).
- 532 51. Excoffier, L. & Lischer, H.E.L. Arlequin suite ver 3.5: a new series of programs to perform  
533 population genetics analyses under Linux and Windows. *Mol. Ecol. Resour.* **10**, 564–567  
534 (2010).
- 535 52. Ersts, P.J. *Geographic Distance Matrix Generator v1.2.3*. American Museum of Natural  
536 History, Center for Biodiversity and Conservation (2006). Available from  
537 [http://biodiversityinformatics.amnh.org/open\\_source/gdmg](http://biodiversityinformatics.amnh.org/open_source/gdmg).
- 538 53. van Etten, J. gdistance: distances and routes on geographical grids. R package version 1,  
539 1-4 (2012). Available from [cran.r-project.org/package=gdistance](http://cran.r-project.org/package=gdistance).
- 540 54. McRae, B.H. Isolation by resistance. *Evolution* **60(8)**, 1551-1561 (2006).
- 541 55. Hijmans, R. J., & Van Etten, J. Raster: geographic data analysis and modeling. R package  
542 version 2, 1-49 (2013). Available from [cran.r-project.org/package=raster](http://cran.r-project.org/package=raster).
- 543 56. Hijmans, R.J., Cameron, S. E., Parra, J.L., Jones, P.G., & Jarvis, A. Very high resolution  
544 interpolated climate surfaces for global land areas. *Int. J. Climatol.* **25(15)**, 1965-1978  
545 (2005).
- 546 57. Tassi, F., Ghirotto, S., Mezzavilla, M., Vilaça, S. T., De Santi, L., & Barbujani, G. Early  
547 modern human dispersal from Africa: genomic evidence for multiple waves of migration.  
548 *Investig. Genet.* **6(1)**, 1 (2015).
- 549 58. Darriba, D., Taboada, G.L., Doallo, R. & Posada, D. jModelTest 2: more models, new  
550 heuristics and parallel computing. *Nat. Methods* **9**, 772 (2012).
- 551 59. Drummond, A.J., Suchard, M.A., Xie, D. & Rambaut, A. Bayesian phylogenetics with  
552 BEAUti and the BEAST 1.7. *Mol. Biol. Evol.* **29**, 1969–1973 (2012).
- 553 60. Soares, P. *et al.* Correcting for purifying selection: an improved human mitochondrial  
554 molecular clock. *Am. J. Hum. Genet.* **84**, 740–759 (2009).
- 555 61. Kumar, S., Stecher, G. & Tamura, K. MEGA7: Molecular Evolutionary Genetics  
556 Analysis version 7.0 for bigger datasets. *Mol. Biol. Evol.* (2016).  
557 doi: 10.1093/molbev/msw054
- 558 62. Sun, H. *et al.* Autosomal STRs provide genetic evidence for the hypothesis that Tai People  
559 originate from Southern China. *PLoS One* **8**, e60822 (2013).

- 560 63. Diroma, M.A. *et al.* Extraction and annotation of human mitochondrial genomes from 1000  
561 Genomes Whole Exome Sequencing data. *BMC Genomics* **15**, S2 (2014).
- 562 64. Vail, P. Thailand's Khmer as "invisible minority": Language, ethnicity and cultural politics  
563 in north-eastern Thailand. *Asian Ethnicity* **8**, 111-130 (2007).
- 564 65. Wegmann, D., Leuenberger, C., Neuenschwander, S. & Excoffier, L. ABCtoolbox: a  
565 versatile toolkit for approximate Bayesian computations. *BMC Bioinformatics* **11**, 116  
566 (2010).
- 567 66. Pritchard, J.K., Seielstad, M.T., Perez-Lezaun, A. & Feldman, M.W. Population growth of  
568 human Y chromosomes: a study of Y chromosome microsatellites. *Mol. Biol. Evol.* **16**,  
569 1791–1798 (1999).
- 570 67. Beaumont, M. Joint determination of topology, divergence time and immigration in  
571 population trees. In: *Simulations, genetics and human prehistory* eds Matsumura S., Forster  
572 P., Renfrew C. McDonald Institute for Archaeological Research (2008)
- 573 68. Husson, F., Josse, J., Lê, S. & Mazet, J. FactoMineR: Factor Analysis and Data Mining  
574 with R. R package version 1.04, (2007). Available from [http://CRAN.R-](http://CRAN.R-project.org/package=FactoMineR)  
575 [project.org/package=FactoMineR](http://CRAN.R-project.org/package=FactoMineR).

576

### 577 **Acknowledgements**

578 We would like to thank all village chiefs and participants who donated their biological  
579 samples. We greatly appreciate the assistance of the following coordinators who assisted in  
580 collecting samples: Khamnikone Sipaseuth, Saksuriya Triyarach, Narongdech Mahasirikul,  
581 Praweena Maneerattanaroongroj, Suparat Srithawong, Kanokpohn Srithongdeang, Nattapol  
582 Poltham and Sukhum Ruangchai. We also thank Roland Schröder, Chiara Barbieri, Leonardo  
583 Arias Alvis, Enrico Macholdt and Sandra Oliveira from MPI-EVA for technical assistance and  
584 valuable advice. This study was primarily funded by the MPI-EVA and Faculty of Science, Khon  
585 Kaen University.

586

### 587 **Author contributions**

588 W.K. and M.S. designed the study; W.K., J.K. M.Sr. and D.K. collected the samples; W.K.  
589 generated the data; W.K., S.G. A.B. and M.S. analysed the data; W.K., S.G. and M.S. drafted the  
590 manuscript.

591

### 592 **Competing financial interests**

593 The authors declare no competing financial interests.

594

595

596

597

598

599

600

601

602

603

604

605

606

607

608

609

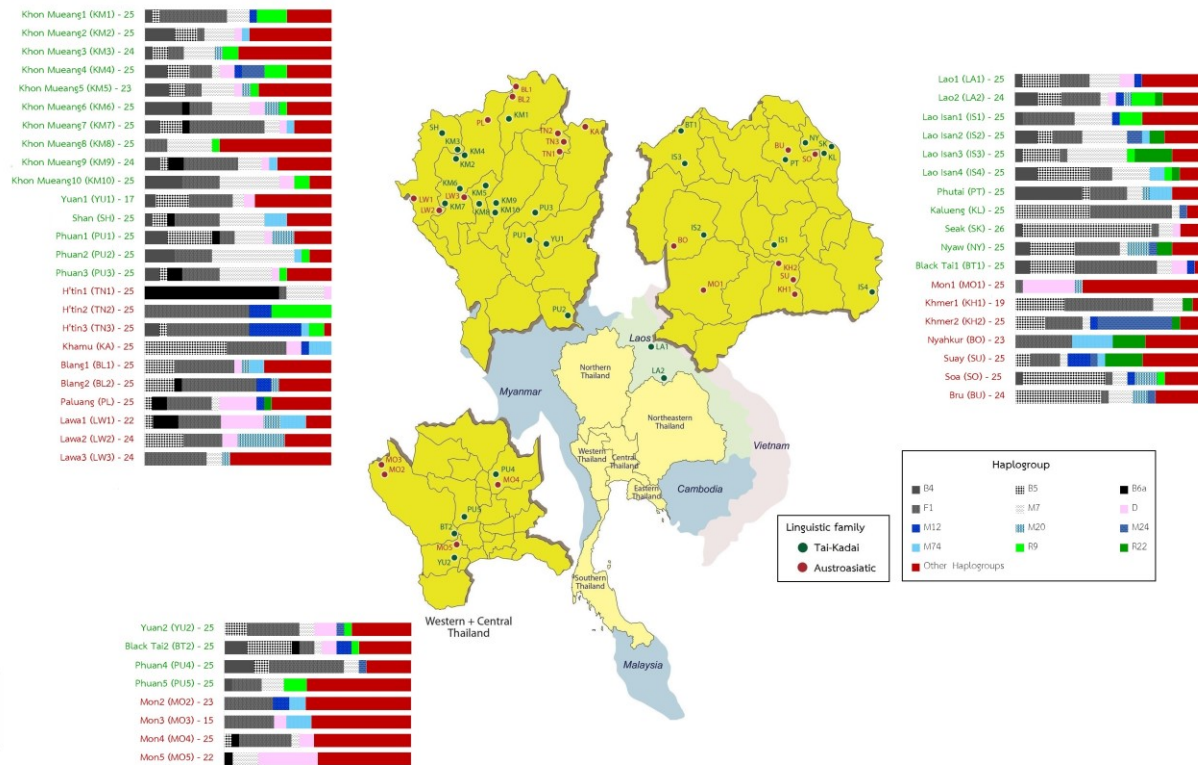

610

611

612 **Figure 1** Map showing the geographic locations of the studied populations and their language  
 613 family affiliation. Bar plots illustrate the relative frequency of major haplogroups by population.  
 614 Dark and white shades show haplogroups B, F and M7, which are specific to Southeast Asian  
 615 populations, whereas the remaining haplogroups (D, M12, M20, M24, M74, R9, R22 and other  
 616 haplogroups) are represented by various colors.

617

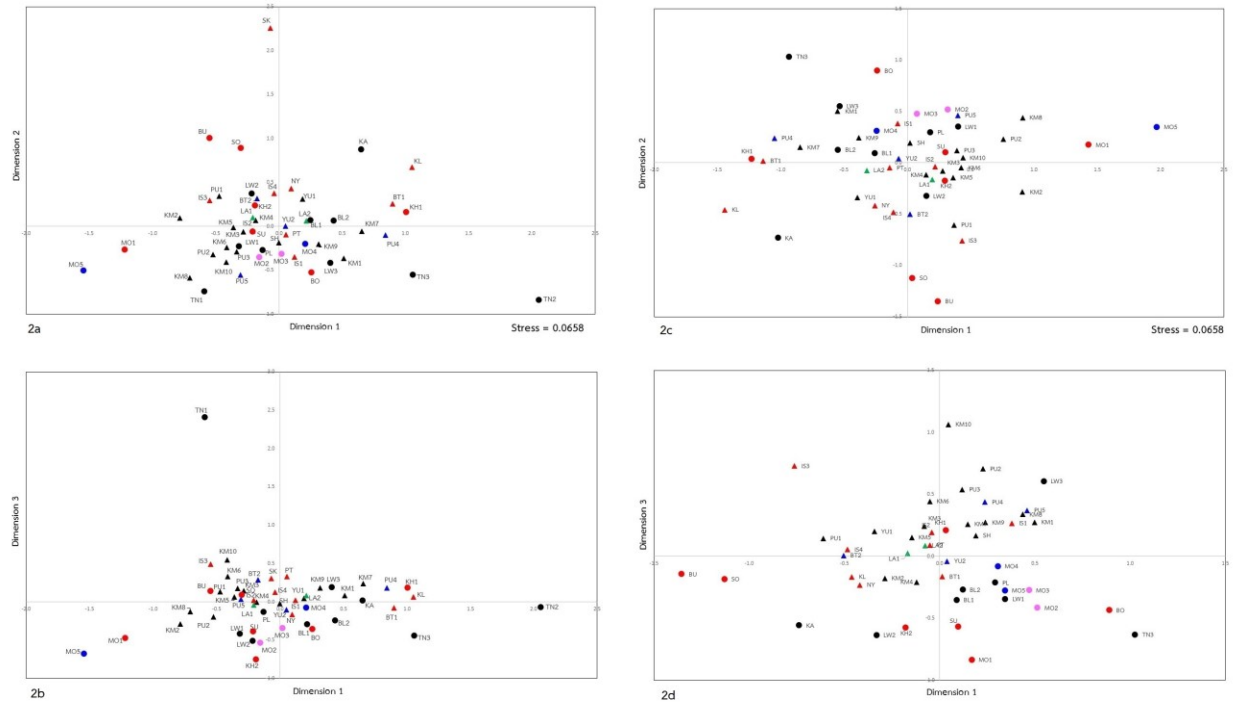

618

619 **Figure 2** MDS plot of dimension 1 vs. dimension 2 (2a and 2c) and dimension 1 vs. dimension 3  
 620 (2b and 2d) based on the  $\Phi_{st}$  genetic distance matrix among the entire set of 51 populations (2a  
 621 and 2b) and after removal of three outliers, namely TN1, TN2 and SK (Fig. 2c and 2d). Population  
 622 abbreviations are provided in Fig. 1. Triangles and circles represent TK and AA speaking  
 623 populations, respectively. Black, red, dark blue and pink colors indicate North, Northeastern,  
 624 Central and West geographic regions of Thailand respectively; green indicates the two Lao  
 625 populations.

626

627

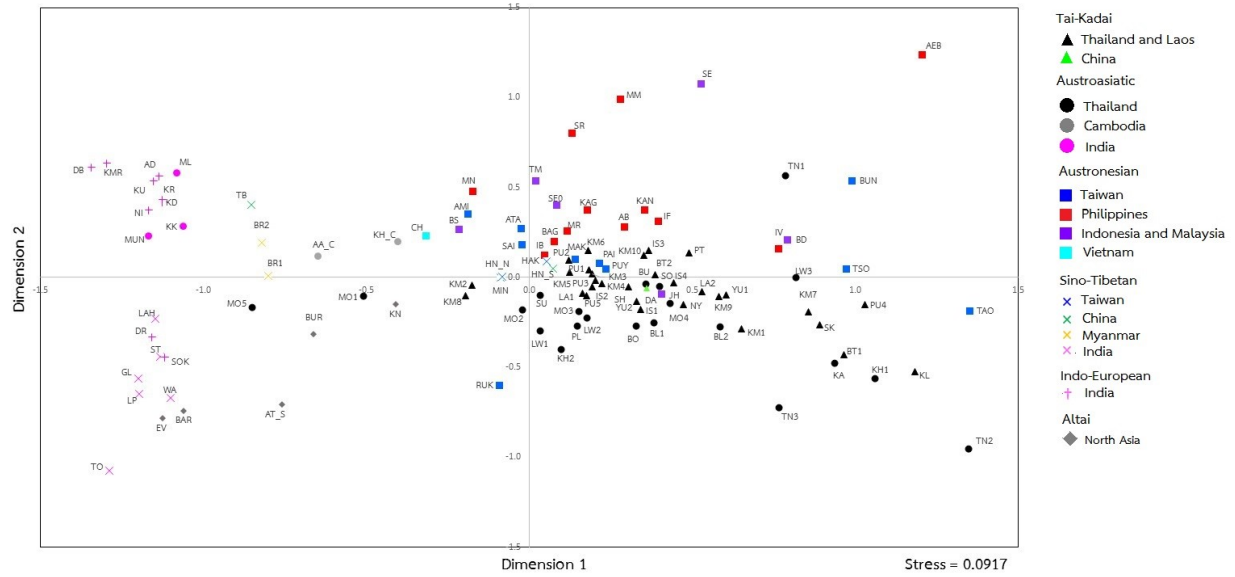

628

629 **Figure 3** MDS plot based on  $\Phi_{st}$  genetic distance matrix from mtDNA genomes among the  
 630 presently studied populations and other populations from the literature. Population abbreviations  
 631 are provided in Fig. 1 and Supplementary Table 4.

632



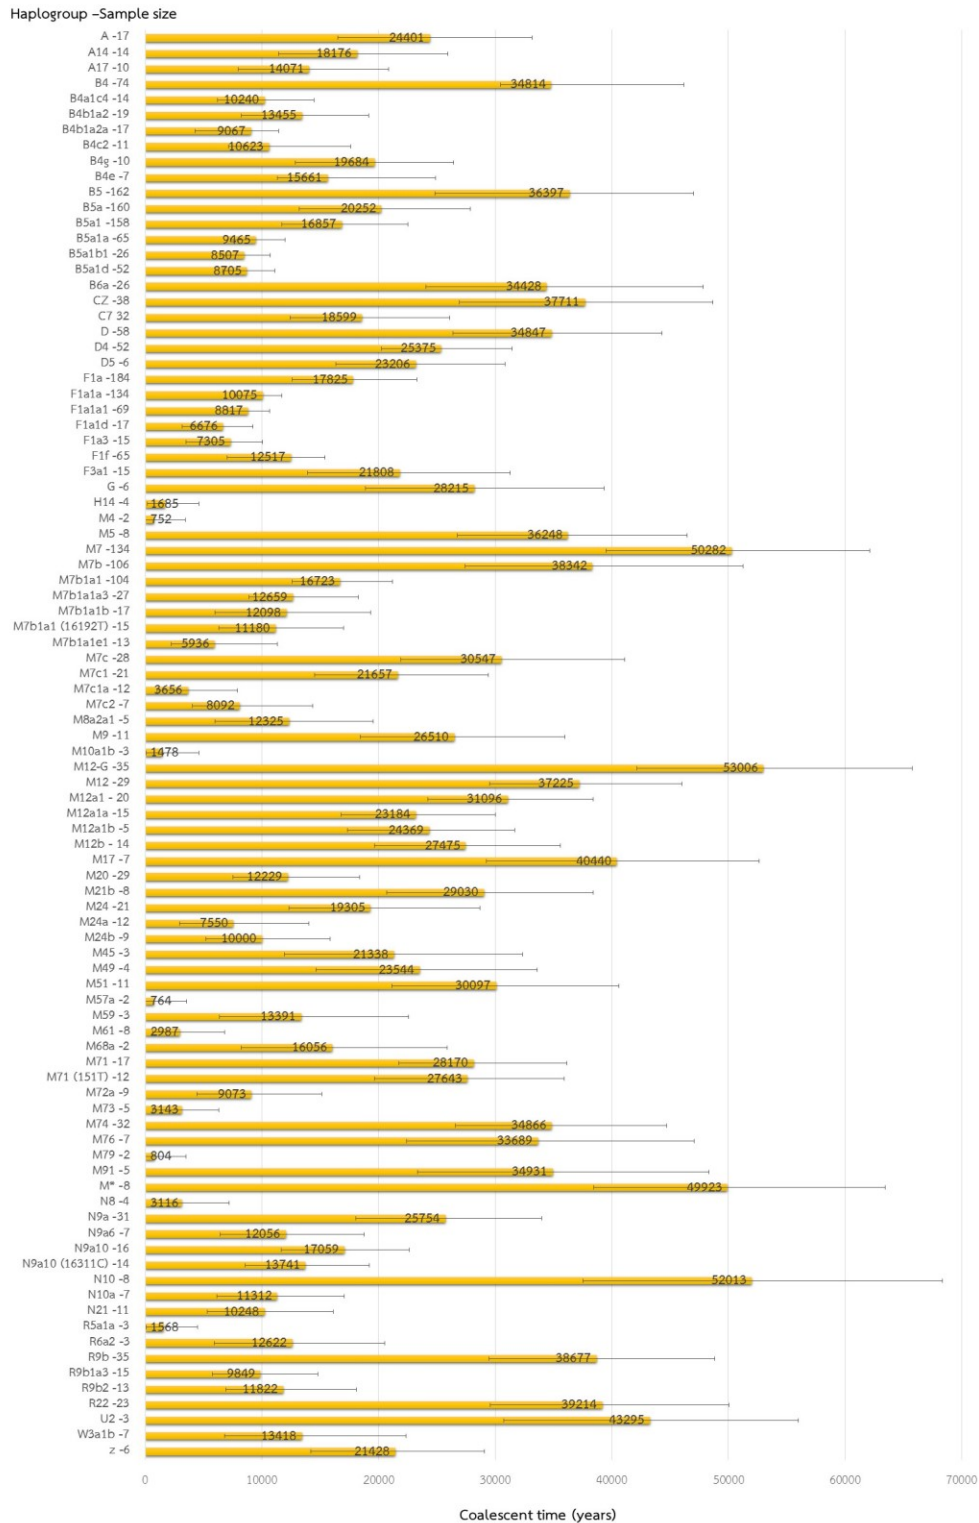

633

634 **Figure 4** The Bayesian estimates (BE) of coalescent times with 95% credible intervals (CI) for  
 635 each haplogroup.

636

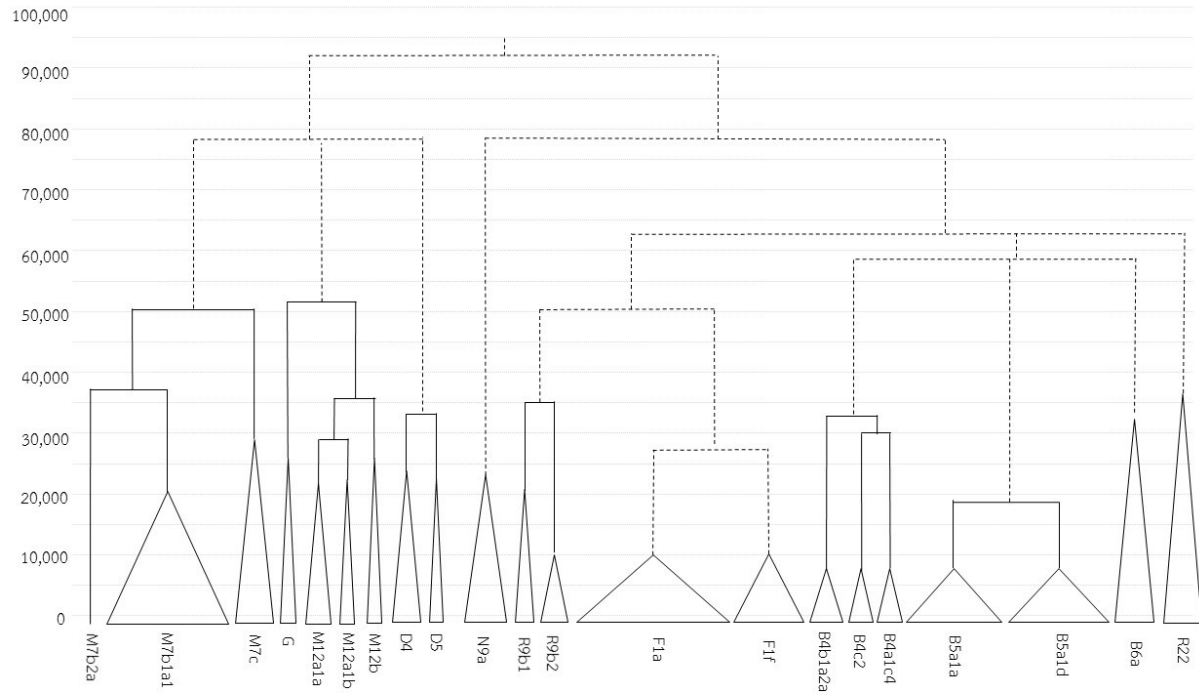

637

638 **Figure 5** Schematic Bayesian MCMC tree of the major haplogroups found in this study. Bayesian  
639 maximum clade credibility trees were constructed for each haplogroup with parameters as  
640 described in the Methods and then manually combined (dashed lines) based on PhyloTree mtDNA  
641 tree build 17. The full Bayesian maximum clade credibility tree for each haplogroup is shown in  
642 Supplementary Fig. 3.

643

644

645

646

647

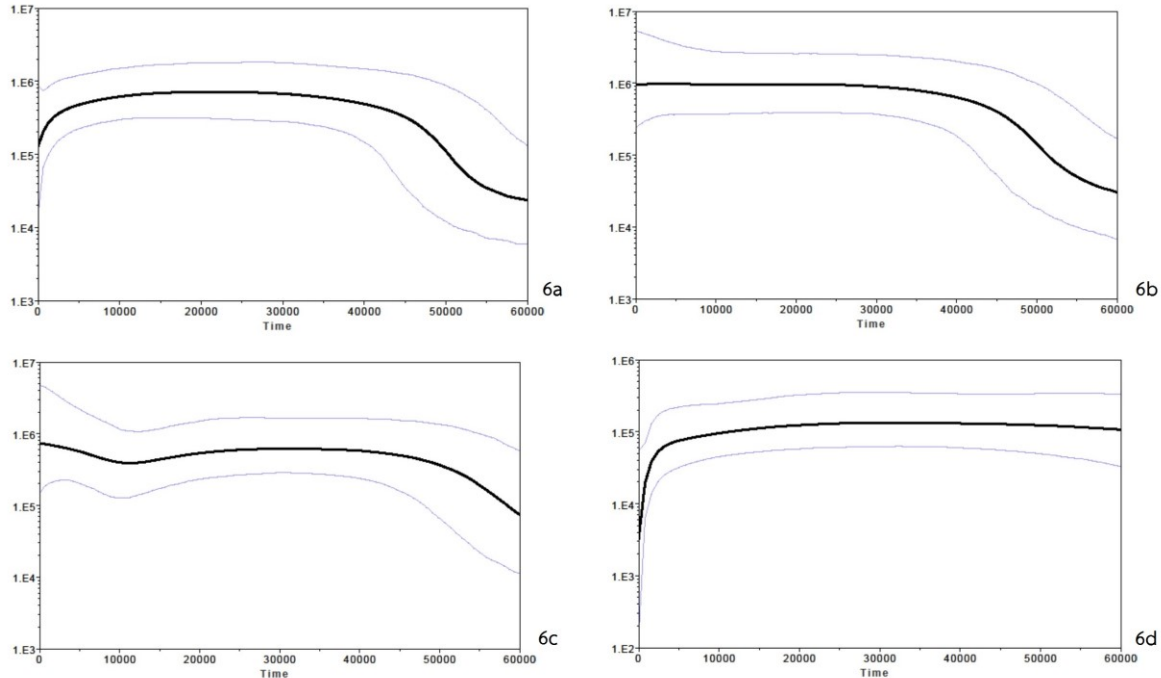

648

649 **Figure 6** Four different trends in fluctuation in maternal effective population size (y-axis) through  
650 time from the present in unit of years (x-axis) observed in the individual Bayesian skyline plots  
651 (BSP) for the 51 populations (Supplementary Fig. 6). The median estimate and the 95% highest  
652 posterior density limits are indicated by thick and thin lines, respectively. The plots were generated  
653 with 10,000,000 chains with the first 1,000,000 generations discarded as burn-in. Most populations  
654 (KM1-KM4, KM6-KM10, YU1-YU2, SH, IS3, PT, NY, KL, SK, BT1-BT2, PU1-PU5, MO1-  
655 MO5, KH2, BU, SO, SU, LW1, PL, BL1-BL2) show the trend in 6a; KM5, IS1-IS2 and LA2 show  
656 the trend in 6b; IS4 and LA1 show the trend in 6c; and KH1, BO, TN1- TN3, KA and LW2-LW3  
657 show the trend in 6d.

658

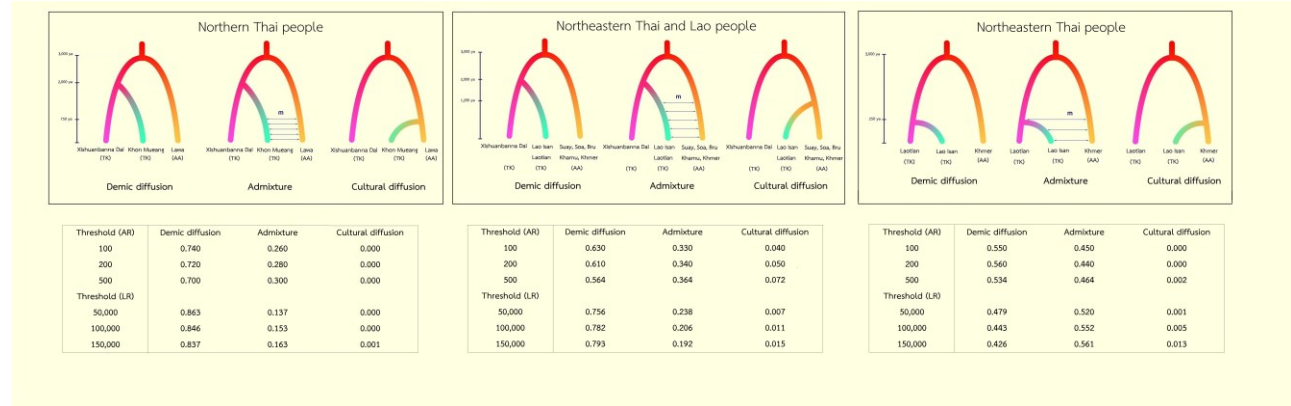

659

660

661 **Figure 7** Proposed demographic models for three independent ABC tests concerning northern  
 662 Thais, northeastern Thais combined with Laotian, and northeastern Thais. Each test consists of  
 663 three scenarios according to three hypotheses, i.e. demic diffusion, admixture and cultural  
 664 diffusion. The tables under each model are posterior probabilities computed by the acceptance-  
 665 rejection procedure (AR) and by the weighted multinomial logistic regression (LR) approaches.

666

667

668

669

670

671

672

673

674

675

676

677

678 **Table 1** Analysis of Molecular Variance (AMOVA) results.

| Grouping              | Number of groups | Percent variation |                                 |                   |
|-----------------------|------------------|-------------------|---------------------------------|-------------------|
|                       |                  | Among groups      | Among population (within group) | Within population |
| <b>Geography</b>      |                  |                   |                                 |                   |
| Geography 1           | 5                | 0.07              | 7.63**                          | 92.3**            |
| Geography 2           | 4                | 0.36              | 7.77**                          | 91.86**           |
| Northern Thailand     | 1                | -                 | 7.76**                          | 92.24             |
| Northeastern Thailand | 1                | -                 | 8.69**                          | 91.31             |
| Central Thailand      | 1                | -                 | 6.83**                          | 93.17             |
| Western Thailand      | 1                | -                 | -0.43                           | 100.43            |
| Laos                  | 1                | -                 | 0.66**                          | 99.34             |
| <b>Language</b>       |                  |                   |                                 |                   |
| Language 1            | 2                | 0.49*             | 7.42**                          | 92.1**            |
| Language 2            | 6                | 2.56**            | 6.01**                          | 91.43**           |
| Language 3            | 10               | 2.42**            | 5.68**                          | 91.9**            |
| Austroasiatic         | 1                | -                 | 11.44**                         | 88.56             |
| Tai-Kadai             | 1                | -                 | 4.74**                          | 95.26             |
| <b>Ethnicity</b>      |                  |                   |                                 |                   |
| Mon                   | 1                | -                 | 7.1**                           | 92.9              |
| H'tin                 | 1                | -                 | 25.71**                         | 74.29             |
| Lawa                  | 1                | -                 | 7.78**                          | 92.22             |
| Khmer                 | 1                | -                 | 11.10**                         | 88.90             |
| Khon Mueang           | 1                | -                 | 3.43**                          | 96.57             |
| Lao Isan              | 1                | -                 | 2.31**                          | 97.69             |
| Phuan                 | 1                | -                 | 5.29**                          | 94.71             |

\*significant at 0.05 level; \*\* significant at 0.01 level.

Geography 1: (Northern Thailand, Northeastern Thailand, Central Thailand, Western Thailand, Laos)

Geography 2: (Northern Thailand, Northeastern Thailand, Central Thailand, Western Thailand)

Language 1: (Austroasiatic, Tai-Kadai)

Language 2: (Northern Tai, Southwestern Tai, Monic, Southern Monic, Eastern Mon-Khmer, Northern Mon-Khmer)

Language 3: (Northern Tai, Chiang Saen, Lao-Phutai, Northwestern Tai, Monic, Southern Monic, Palaungic, Khmuic, Khmer, Katuic)
